# Supplementary material
Source: PubMed Central journal article supplement (PMC7015094)

## **Supplemental Materials**

### **Table of Contents**

Supplemental Table 1. Summary of studies reporting association of PSG-measured sleep apnea severity with mortality in patients with CKD and/or ESKD

Supplemental Table 2. Missing data for key variables

Supplemental Table 3. Sensitivity analysis of association of sleep measures with mortality by censoring at the time of kidney transplant

Supplemental Figure 1. Participant enrollment in the study

Supplemental Table 1. Summary of studies reporting association of PSG-measured sleep apnea severity with mortality in patients with CKD and/or ESKD

| Author                                      | Sample size/Re-nal status | Clinical characteristic                                                                        | Baseline sleep assessment                                                                                                                                          | Follow up duration | Results                                                                                                                                                                      | Selection bias                         |
|---------------------------------------------|---------------------------|------------------------------------------------------------------------------------------------|--------------------------------------------------------------------------------------------------------------------------------------------------------------------|--------------------|------------------------------------------------------------------------------------------------------------------------------------------------------------------------------|----------------------------------------|
| Benz et al. <sup>19</sup> , 2000 (USA)      | 29 HD                     | Age 59 ± 13 yrs, 62% male, 48% black, dialysis vintage 38 months, 7% had KTx                   | Mean RDI (number of apneas/hrs of sleep)= 45 ± 37/hr<br><br>Avg PLMI = 70/hr                                                                                       | 14 months          | Increased PLMI (>20) was associated with increased mortality. No association of RDI, sleep duration, efficiency, hypoxemia, or stages of sleep with mortality                | Yes, patients referred to sleep clinic |
| Jung et al. <sup>20</sup> , 2010 (Korea)    | 30 HD                     | Age 56 ± 11 yrs, 77% males, 50% DM, vintage 44 months, no KTx data available                   | Median AHI = 22/hr (range: 1-67/hr)<br><br>Median PLMI = 37/hr (range: 1-208/hr)                                                                                   | 48 months          | Nocturnal hypoxemia and PLMI were associated with increased mortality.<br><br>No association of AHI, ODI, sleep duration, efficiency or mean SaO <sub>2</sub> with mortality | Yes, single center                     |
| Sivalingam et al. <sup>21</sup> , 2013 (UK) | 91 HD                     | Age 60 ± 14 yrs, 66% males, 17% DM, 30% CVD, dialysis vintage 44 months, no KTx data available | Mean AHI 34 ± 17/hr<br><br>44% had Major OSA (MOSA) defined as AHI≥15 together with significant desaturation (ODI≥15) or symptoms of daytime sleepiness Epworth>10 | 44 months          | No association of AHI, ODI or MOSA with mortality                                                                                                                            | No                                     |
| Tang et al. <sup>22</sup> , 2010 (China)    | 93 PD                     | Age 55 ± 15 yrs, 52% males, 45% DM, 22% CVD, dialysis vintage 10 months, 14% had KTx           | Median AHI = 22/h (interquartile range 3–48/hr)<br><br>55% had Sleep Apnea (SA) syndrome defined as AHI ≥15                                                        | 41 months          | SA syndrome associated with increased mortality in multivariable analysis.                                                                                                   | No                                     |

|                                                      |                                                                 |                                                                                                                                 |                            |                      |                                                                                                                                          |                                                           |
|------------------------------------------------------|-----------------------------------------------------------------|---------------------------------------------------------------------------------------------------------------------------------|----------------------------|----------------------|------------------------------------------------------------------------------------------------------------------------------------------|-----------------------------------------------------------|
| <p>Xu et al.<sup>14</sup>,<br/>2016,<br/>(Korea)</p> | <p>103<br/>CKD<br/>(out of<br/>total<br/>1454<br/>patients)</p> | <p>Age 67 ± 11 yrs,<br/>58% males, 22%<br/>DM, eGFR 49 ±<br/>11<br/>ml/min/1.73m<sup>2</sup>,<br/>no KTx data<br/>available</p> | <p>Mean RDI 29 ± 22/hr</p> | <p>47<br/>months</p> | <p>Central Sleep<br/>Apnea is<br/>associated with<br/>all-cause mortality</p> <p>No association of<br/>OSA or RDI with<br/>mortality</p> | <p>Yes,<br/>patients<br/>referred to<br/>sleep clinic</p> |
|------------------------------------------------------|-----------------------------------------------------------------|---------------------------------------------------------------------------------------------------------------------------------|----------------------------|----------------------|------------------------------------------------------------------------------------------------------------------------------------------|-----------------------------------------------------------|

Supplemental Table 2. Missing data for key variables

| Variable                    | ALL                  | Alive                | Died                 | p-value |
|-----------------------------|----------------------|----------------------|----------------------|---------|
|                             | <i>n</i> missing (%) | <i>n</i> missing (%) | <i>n</i> missing (%) |         |
| Sleep variables             |                      |                      |                      |         |
| Apnea hypopnea index        | 0 (0%)               | 0 (0%)               | 0 (0%)               | --      |
| Nocturnal hypoxemia         | 3 (2%)               | 2 (2%)               | 1 (1%)               | 0.99    |
| Mean oxygen saturation      | 7 (4%)               | 5 (5%)               | 2 (2%)               | 0.45    |
| Oxygen Desaturation index   | 5 (3%)               | 3 (3%)               | 2 (2%)               | 0.99    |
| Total sleep                 | 0 (0%)               | 0 (0%)               | 0 (0%)               | --      |
| Sleep efficiency            | 0 (0%)               | 0 (0%)               | 0 (0%)               | --      |
| Periodic leg movement index | 2 (1%)               | 1 (1%)               | 1 (1%)               | 0.99    |
| Covariates                  |                      |                      |                      |         |
| Age                         | 0 (0%)               | 0 (0%)               | 0 (0%)               | --      |
| Sex                         | 0 (0%)               | 0 (0%)               | 0 (0%)               | --      |
| Kidney disease              | 0 (0%)               | 0 (0%)               | 0 (0%)               | --      |
| Kidney transplant recipient | 0 (0%)               | 0 (0%)               | 0 (0%)               | --      |
| Race                        | 0 (0%)               | 0 (0%)               | 0 (0%)               | --      |
| Diabetes                    | 15 (8%)              | 7 (7%)               | 8 (10%)              | 0.79    |
| BMI                         | 23 (13%)             | 9 (9%)               | 14 (17%)             | 0.22    |

Supplemental Table 3. Sensitivity analysis of association of sleep measures with mortality by censoring at the time of kidney transplant

| Variable                                                                                                             | Primary analysis  |         | Analysis censored at time of kidney transplant |         |
|----------------------------------------------------------------------------------------------------------------------|-------------------|---------|------------------------------------------------|---------|
|                                                                                                                      | HR (95% CI)       | p-value | HR (95% CI)                                    | p-value |
| Hypoxemia-based measures                                                                                             |                   |         |                                                |         |
| Apnea hypopnea index, for every 5 events/hour higher                                                                 | 1.01(0.96,1.05)   | 0.75    | 1.01(0.96,1.05)                                | 0.81    |
| Nocturnal hypoxemia (proportion of sleep time with oxygen saturation <90%), for every 10 percent higher <sup>#</sup> | 1.23(1.08,1.41)   | 0.002   | 1.11(0.94,1.31)                                | 0.20    |
| Mean oxygen saturation, for every 10 percent lower                                                                   | 10.21(2.76,37.77) | <0.001  | 6.27(1.27,31.08)                               | 0.02    |
| Oxygen Desaturation index, for every 10 events/hour higher <sup>#</sup>                                              | 1.01(0.90,1.14)   | 0.86    | 1.01(0.89,1.14)                                | 0.92    |
| Other PSG measures                                                                                                   |                   |         |                                                |         |
| Total sleep, for every hour lower**                                                                                  | 1.06 (0.93,1.22)  | 0.38    | 0.98(0.83,1.15)                                | 0.78    |
| Sleep efficiency, for every 10 percent lower                                                                         | 1.05(0.88,1.25)   | 0.6     | 0.99(0.81,1.22)                                | 0.92    |
| Periodic leg movement index, for every 10 events/hour higher                                                         | 1.00(0.96,1.05)   | 0.99    | 0.98(0.93,1.03)                                | 0.45    |

\* Adjusted model is adjusted for age, sex, race, diabetes, BMI, renal function status (CKD or ESKD).

\*\* Time-to-mortality was calculated from time of transplantation to account for varying times participants received kidney transplant.

Supplemental Figure 1. Participant enrollment in the study

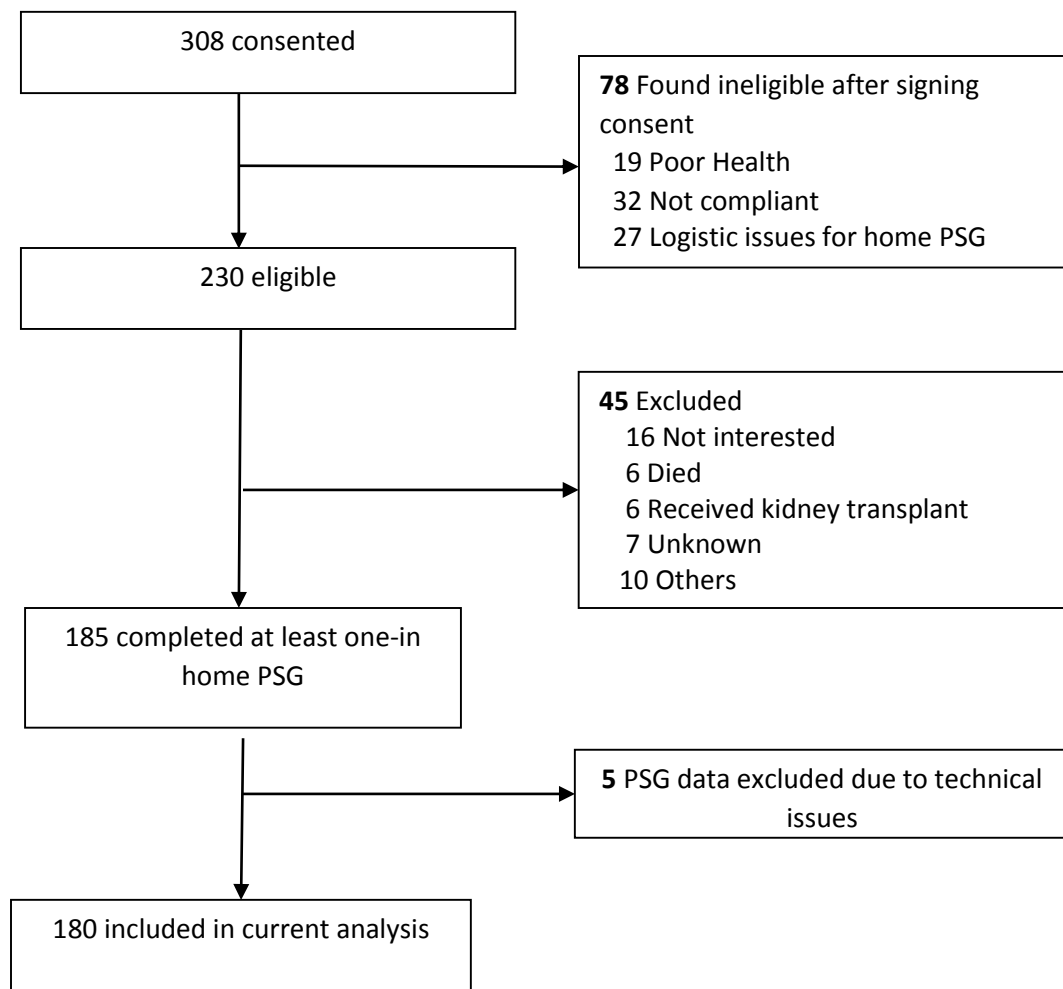

Supplement: CJN.07880719SupplementaryData.pdf [file CJN.07880719SupplementaryData.pdf]
